# Supplementary material for: A naked-eye and ratiometric near-infrared probe for palladium via modulation of a π-conjugated system of cyanines
Source: Royal Society of Chemistry journal article supplement (doi:10.1039/c4cc05871b), 2014-01-01
Supplement: c4cc05871b1.pdf [file c4cc05871b1.pdf]

## Electronic Supplementary Information (ESI)

# A naked-eye and ratiometric near-infrared probe for palladium via modulating $\pi$ -conjugated system of cyanines

Xiaohang Wang, Zhiqian Guo,\* Shiqin Zhu, He Tian, and Weihong Zhu\*

*Shanghai Key Laboratory of Functional Materials Chemistry, Key Laboratory for Advanced Materials and Institute of Fine Chemicals, East China University of Science and Technology, Shanghai 200237, P. R. China. E-mail: [guozq@ecust.edu.cn](mailto:guozq@ecust.edu.cn); [whzhu@ecust.edu.cn](mailto:whzhu@ecust.edu.cn)*

## Table of Contents

**Scheme S1** Synthetic Route of **Cy-1**

**Fig. S1** Normalized absorption and emission spectra of **CyK** and **Cy-1**

**Fig. S2** Excitation spectra of **Cy-1** with the addition of palladium

**Fig. S3** Time-depend emission spectra of **CyK** upon addition of palladium

**Fig. S4** Fluorescent intensity and job plot of detection

**Fig. S5** Two-dimensional  $^1\text{H}$ - $^1\text{H}$  NOESY NMR spectroscopy of **CyK**

**Fig. S6**  $^{13}\text{C}$  NMR spectroscopy of **Cy-1** and **CyK**

**Fig. S7** Mass spectra of **Cy-1** in the presence of palladium

**Fig. S8** Emission spectra of **Cy-1** with different kinds of palladium

**Fig. S9**  $^1\text{H}$  and  $^{13}\text{C}$  NMR spectra and HRMS of **CyK** in the presence of palladium.

**Fig. S10**  $^1\text{H}$  and  $^{13}\text{C}$  NMR spectra and HRMS of **Cy-1** in the presence of palladium.

**Table S1.** Chemical shifts  $^1\text{H}$  NMR of alkene-H and Ph-H of **CyK** and **Cy-1**

**Table S2.** Chemical shifts  $^{13}\text{C}$  NMR of specific  $\alpha$  carbon in cyanines

## 1. General Information

Unless otherwise noted, materials were obtained from Aldrich and were used without further purification. All solvents were of analytical grade. The stock solution of **Cy-1** was prepared in acetonitrile, and the stock solution of Pd(PPh<sub>3</sub>)<sub>4</sub> was prepared in THF. <sup>1</sup>H and <sup>13</sup>C NMR in CDCl<sub>3</sub> were obtained by a Bruker AV-400 spectrometer with tetramethylsilane (TMS) as internal standard. High Resolution Mass Spectra (HRMS) were obtained by a Waters LCT Premier XE spectrometer. Absorption spectra were measured on a Varian Cary 500 spectrophotometer at 25 °C. Fluorescence spectra were recorded on a Varian Cary Eclipse fluorescence spectrophotometer (1 cm quartz cell) at 25 °C. Deionized water was used to prepare all aqueous solutions. Cell imaging was performed with an inverted FL microscope (Nikon Eclipse Ti).

### Scheme S1 Synthetic Route of Cy-1

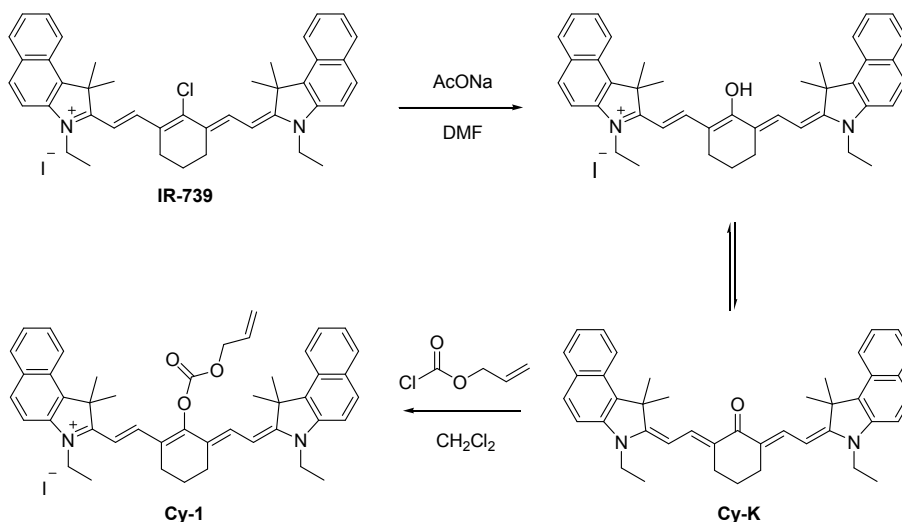

#### Synthesis of CyK

A mixture of IR-739 (311 mg, 0.41 mmol) and sodium acetate (125 mg, 1.49 mmol) in 15 mL *N,N*-dimethylformamide was heated at 90 °C for 6 h under Ar atmosphere. The solvent was removed by rotary evaporation to obtain red oil product, and then the product was purified by column chromatography (silicon gel column, dichloromethane: triethylamine = 100 : 1) to obtain a red powder (210 mg), yield 64 %. <sup>1</sup>H NMR (400 MHz, CDCl<sub>3</sub>, ppm): δ 1.33 (t, *J* = 7.2 Hz, 6H, -NCH<sub>2</sub>CH<sub>3</sub>), 1.93-1.87 (m, 2H, -CH<sub>2</sub>-), 2.01 (s, 12H, -CH<sub>3</sub>), 2.66 (t, *J* = 5.6 Hz, 4H, -CH<sub>2</sub>-CH<sub>2</sub>-), 3.85 (q, *J* = 7.2 Hz, 4H, -NCH<sub>2</sub>CH<sub>3</sub>), 5.51 (d, *J* = 13.4 Hz, 2H, alkene-H), 7.07 (d, *J* = 8.8 Hz, 2H, Ph-H), 7.27 (t, *J* = 7.2 Hz, 2H, Ph-H), 7.47 (t, *J* = 8.4 Hz, 2H, Ph-H), 7.76 (d, *J* = 8.8 Hz, 2H, Ph-H), 7.80 (d, *J* = 8.2 Hz, 2H, Ph-H), 8.04 (d, *J* = 8.4 Hz, 2H, Ph-H), 8.32 (d, *J* = 13.4 Hz, 2H, alkene-H). <sup>13</sup>C NMR (100 MHz, CDCl<sub>3</sub>, ppm): δ 11.50, 22.63, 25.90, 27.93, 29.24, 31.45, 36.50, 37.17, 48.59, 91.79, 109.00, 121.86, 122.50, 126.33, 126.80, 129.41, 129.92, 132.76, 141.07, 162.55, 163.6, 186.28. HRMS (ESI): calcd. for [C<sub>42</sub>H<sub>44</sub>ON<sub>2</sub> + H]<sup>+</sup> 593.3526; found 593.3528.

#### Synthesis of Cy-1

To a solution of CyK (200 mg, 0.28 mmol) and triethylamine (0.5 mL) in 10 mL of CH<sub>2</sub>Cl<sub>2</sub> at 0 °C, a mixture of allyl carbonochloridate (1.5 mL) and CH<sub>2</sub>Cl<sub>2</sub> (8 mL) was added dropwise

and kept stirring at this temperature for 30 min. Then the mixture was warmed to room temperature and stirred overnight. The mixture was concentrated under vacuum to get a deep green solid. The product was purified by column chromatography (dichloromethane : methanol : triethylamine = 100 : 1 : 1) to get a green solid (135 mg), yield 60.5 %. <sup>1</sup>H NMR (400 MHz, CDCl<sub>3</sub>, ppm): δ 1.51 (t, *J* = 7.2 Hz, 6H, -NCH<sub>2</sub>CH<sub>3</sub>), 1.94 (s, 12H, -CH<sub>3</sub>), 2.06-2.01 (m, 2H, -CH<sub>2</sub>-), 2.80-2.73 (m, 4H, -CH<sub>2</sub>-CH<sub>2</sub>-), 4.37 (q, *J* = 7.2 Hz, 4H, -NCH<sub>2</sub>CH<sub>3</sub>), 4.86 (d, *J* = 5.6 Hz, 2H, -O-CH<sub>2</sub>-), 5.45 (d, *J* = 10.4 Hz, 1H, alkene-H), 5.56 (d, *J* = 17.2 Hz, 1H, alkene-H), 6.16-6.04 (m, 1H, alkene-H), 6.22 (d, *J* = 14.2 Hz, 2H, alkene-H), 7.52-7.43 (m, 4H, Ph-H), 7.62 (t, *J* = 7.6 Hz, 2H, Ph-H), 7.90 (d, *J* = 14.2 Hz, 2H, alkene-H), 7.98-7.94 (m, 4H, Ph-H), 8.10 (d, *J* = 8.4 Hz, 2H, Ph-H). <sup>13</sup>C NMR (100 MHz, CDCl<sub>3</sub>, ppm): δ 12.72, 14.11, 20.70, 22.61, 24.55, 27.64, 31.54, 40.05, 46.14, 51.00, 69.99, 99.80, 110.57, 120.94, 121.82, 125.23, 127.88, 128.06, 130.21, 130.73, 130.98, 131.97, 133.78, 139.05, 139.14, 152.59, 158.75, 172.80. HRMS (ESI): calcd. for [C<sub>46</sub>H<sub>49</sub>O<sub>3</sub>N<sub>2</sub> + H]<sup>+</sup> 677.3738; found 677.3743.

### **Reaction Cy-1 with the addition of Pd(PPh<sub>3</sub>)<sub>4</sub> at room temperature**

**Cy-1** (20 mg) and Pd(PPh<sub>3</sub>)<sub>4</sub> (50 eq) was mixed in CH<sub>3</sub>CN (5 mL), and stirred for 1 h at room temperature. The color of solution was obviously changed from blue to red. Then, we checked our product using thin layer chromatography (TLC) compared with **CyK**. Moreover, the final product was purified by silica chromatography eluting with CH<sub>2</sub>Cl<sub>2</sub>/CH<sub>3</sub>OH. The obtained product was also confirmed as **CyK** by <sup>1</sup>H and <sup>13</sup>C NMR.

### **Cell imaging**

**Cell culture:** The human cervical adenocarcinoma HeLa cell line was supplied by the Institute of Cell Biology (Shanghai, China). They were cultured at 37 °C under a humidified 5% CO<sub>2</sub> atmosphere in RPMI-1640 medium (GIBCO/Invitrogen, Camarillo, CA, USA) supplemented with 10% fetal bovine serum (FBS) (Biological Industry, Kibbutz Beit Haemek, Israel) and 1% penicillin-streptomycin (10,000 U/ml penicillin and 10 mg/ml streptomycin, Solarbio life science, Beijing, China). The HeLa cells at 2 × 10<sup>5</sup> cells/mL were plated on 20 mm glass

cover slips in a 6-well plates, and allowed to adhere overnight. The live cells were stained with either 10.0  $\mu\text{M}$  of **Cy-1** (by adding 20  $\mu\text{L}$  of a 500.0  $\mu\text{M}$  stock solution in DMSO to 1 mL culture medium) for different times. Then the cells were washed three times with PBS buffer, and the medium was replaced with PBS buffer before imaging.

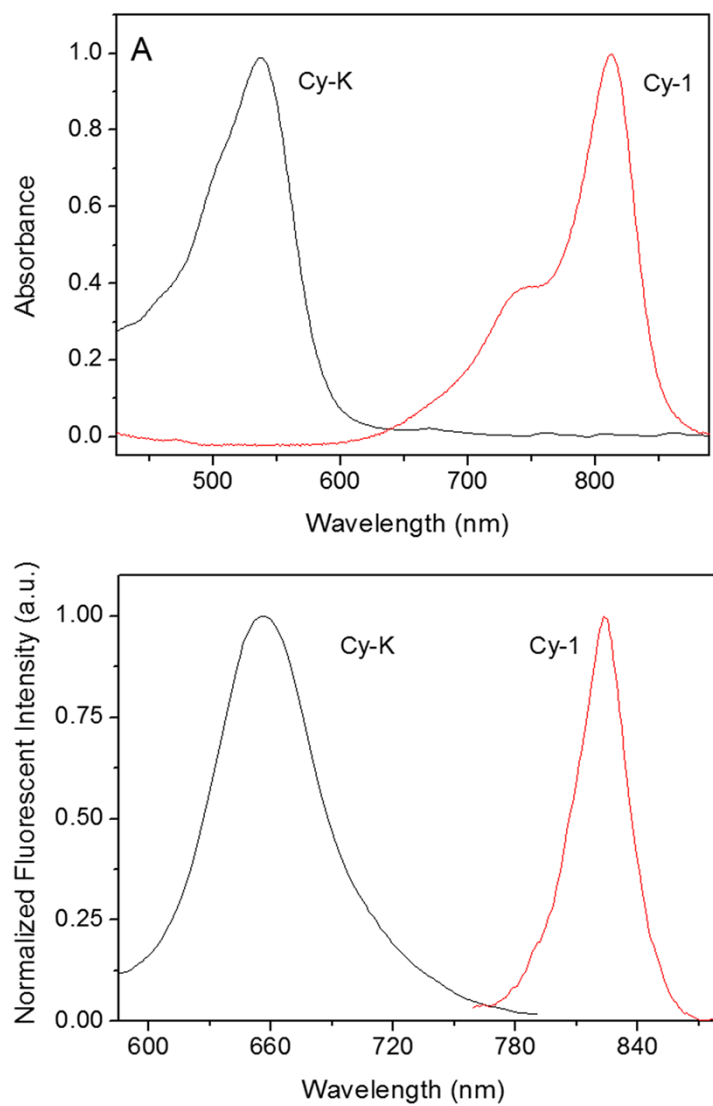

**Fig. S1** Normalized absorption and emission spectra of **CyK** and **Cy-1** in a mixture solution of  $\text{CH}_3\text{CN}$ : PBS (1 : 3, pH = 7.4, 0.01 M).

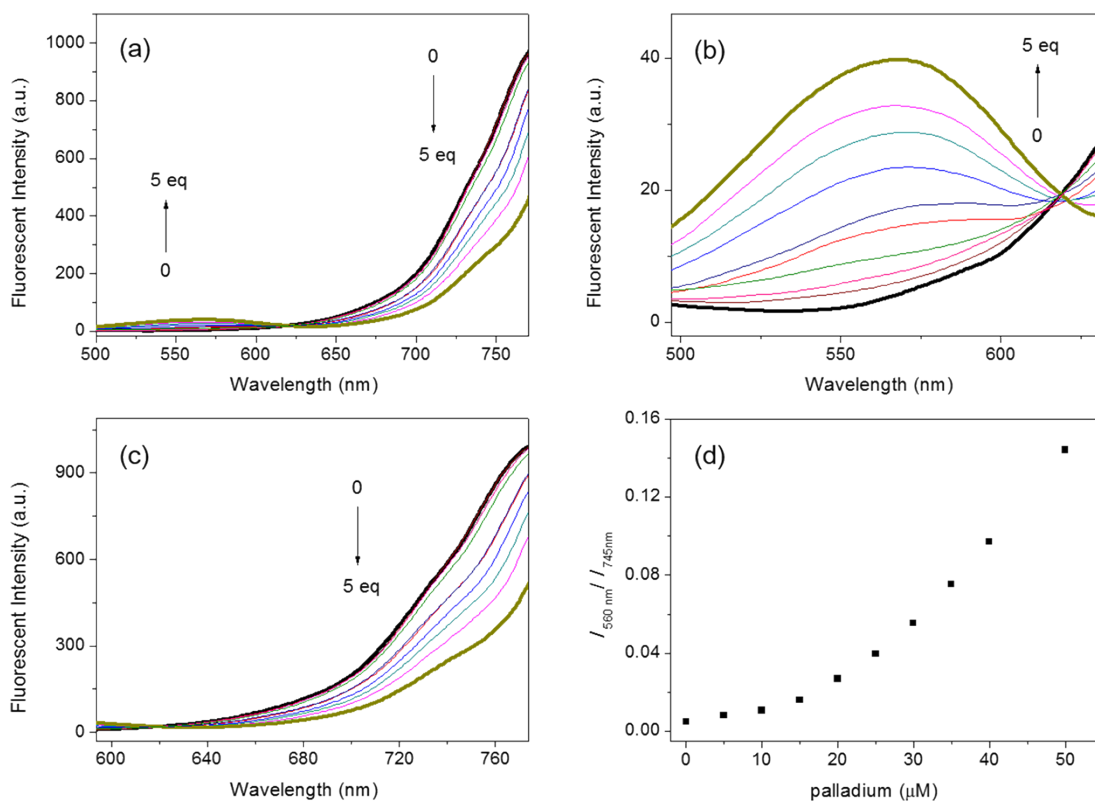

**Fig. S2** Excitation spectra properties of Cy-1 (10  $\mu\text{M}$ ) upon titration of  $\text{Pd}(\text{PPh}_3)_4$  (0-50  $\mu\text{M}$ ) in mixture solution of  $\text{CH}_3\text{CN}$ : PBS (1: 3, 0.01M, pH = 7.4) using 825 nm as monitor wavelength. Each spectrum was recorded after the addition of palladium at 20 min.



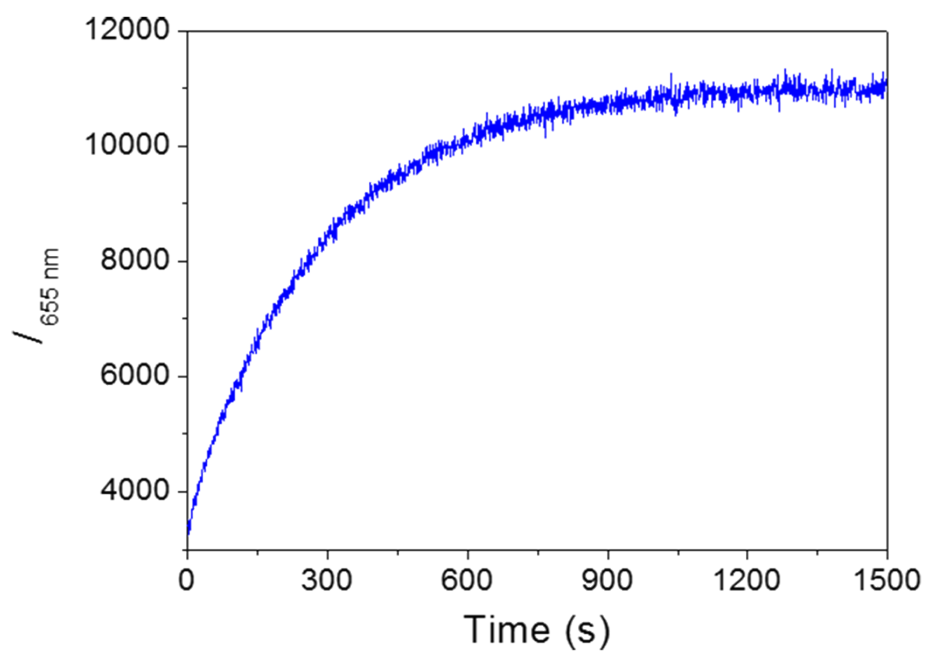

**Fig. S3** Time-depend fluorescent intensity changes at 655 nm ( $I_{655\text{nm}}$ ) of **Cy-1** in the presence of 50  $\mu\text{M}$   $\text{Pd}(\text{PPh}_3)_4$  in  $\text{CH}_3\text{CN}$ -PBS (1 : 3, v/v) solution upon excitation at 545 nm.

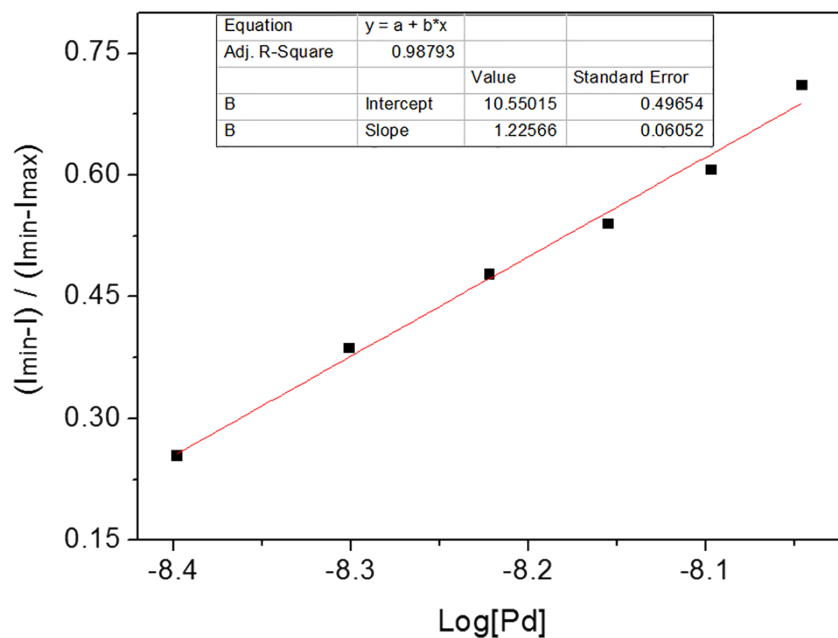

**Fig. S4** Fluorescence intensity changes at 665 nm with the concentration of palladium Pd(PPh<sub>3</sub>)<sub>4</sub>. Note: The detection limit was calculated based on the fluorescence titration. The fluorescence emission spectrum of probe Cy-1 at 665 nm was measured by three times. The limit of detection for palladium is 2.47 nM (0.26 ppb).

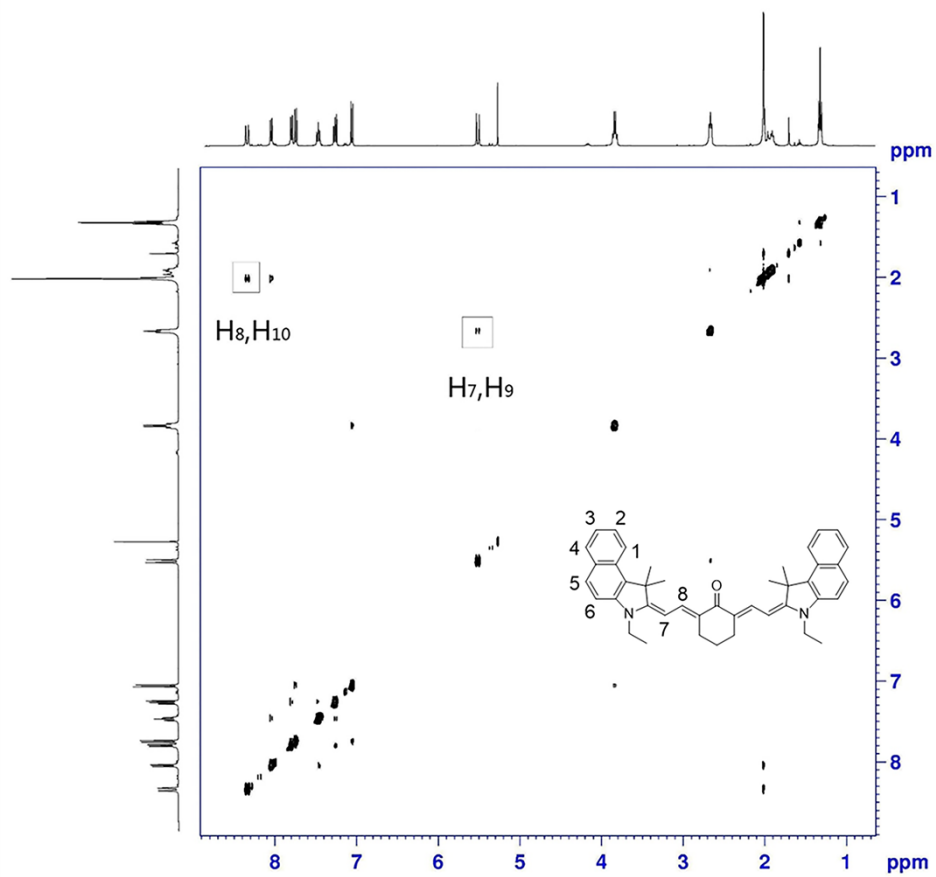

**Fig. S5** Two-dimensional  $^1\text{H}$ - $^1\text{H}$  NOESY spectroscopy of **CyK** in  $\text{CDCl}_3$ .

**Table S1.** Chemical shift  $^1\text{H}$  NMR of alkene-H and Ph-H in **CyK** and **Cy-1** ( $\text{CDCl}_3$ )

|                                             | 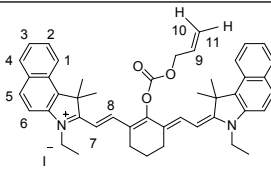 |  |
|---------------------------------------------|-----------------------------------------------------------------------------------|-------------------------------------------------------------------------------------|
| $\text{H}_1$                                | 8.10                                                                              | 8.05                                                                                |
| $\text{H}_2$                                | 7.63                                                                              | 7.45                                                                                |
| $\text{H}_3$                                | 7.49                                                                              | 7.27                                                                                |
| $\text{H}_4$                                | 7.97                                                                              | 7.81                                                                                |
| $\text{H}_5$                                | 7.96                                                                              | 7.76                                                                                |
| $\text{H}_6$                                | 7.47                                                                              | 7.07                                                                                |
| <b>Alkene-H <math>H_7</math></b>            | <b>7.90</b>                                                                       | <b>8.34</b>                                                                         |
| <b>Alkene-H <math>H_8</math></b>            | <b>6.26</b>                                                                       | <b>5.51</b>                                                                         |
| $\Delta \delta = \delta_{H7} - \delta_{H8}$ | <b>1.64</b>                                                                       | <b>2.83</b>                                                                         |
| Alkene-H $H_9$                              | 6.04                                                                              |                                                                                     |
| Alkene-H $H_{10}$                           | 5.56                                                                              |                                                                                     |
| Alkene-H $H_{11}$                           | 5.45                                                                              |                                                                                     |

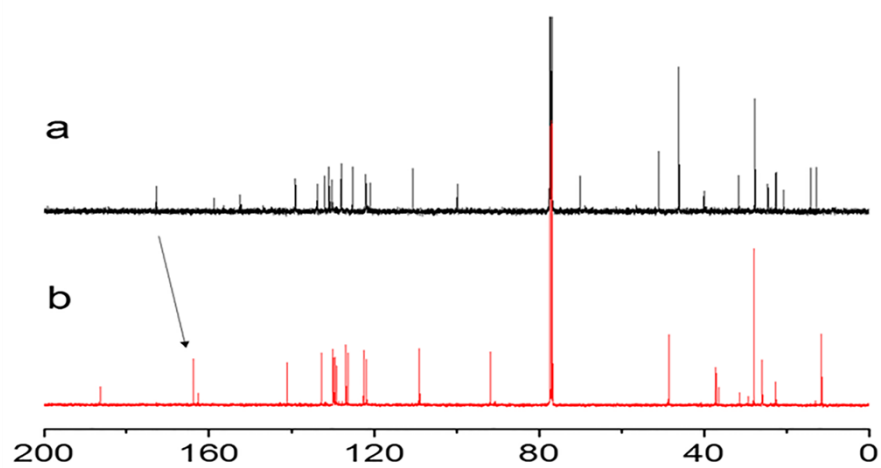**Figure S6.**  $^{13}\text{C}$  NMR spectroscopy of **Cy-1** (a) and **CyK** (b)

**Table S2.** Chemical shift  $^{13}\text{C}$  NMR of specific  $\alpha$  carbon in **CyK** and **Cy-1** ( $\text{CDCl}_3$ )

---

|                                                                                                                                                                                                                                                                                                                                                                                                                                                                                                                                                                                                      |                                                                                                                                                                                                                                                                                                                                                                                                                                                                                   |
|------------------------------------------------------------------------------------------------------------------------------------------------------------------------------------------------------------------------------------------------------------------------------------------------------------------------------------------------------------------------------------------------------------------------------------------------------------------------------------------------------------------------------------------------------------------------------------------------------|-----------------------------------------------------------------------------------------------------------------------------------------------------------------------------------------------------------------------------------------------------------------------------------------------------------------------------------------------------------------------------------------------------------------------------------------------------------------------------------|
| 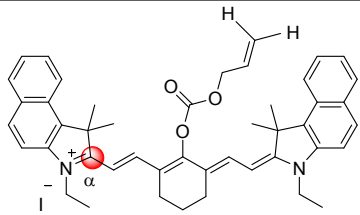 <p>The structure of CyK is a macrocyclic complex. It features two indole-like rings, each with a nitrogen atom substituted with an ethyl group. These rings are connected via a central chain that includes a cyclohexane ring and a carbonyl group. A specific carbon atom, labeled with the Greek letter alpha (<math>\alpha</math>) and highlighted in red, is the carbon atom adjacent to the nitrogen in the left-hand indole ring. The structure also includes a side chain with a terminal vinyl group.</p> |  <p>The structure of Cy-1 is a macrocyclic complex similar to CyK. It features two indole-like rings, each with a nitrogen atom substituted with an ethyl group. These rings are connected via a central chain that includes a cyclohexane ring and a carbonyl group. A specific carbon atom, highlighted in red, is the carbon atom adjacent to the nitrogen in the left-hand indole ring.</p> |
| 172.80                                                                                                                                                                                                                                                                                                                                                                                                                                                                                                                                                                                               | 163.77                                                                                                                                                                                                                                                                                                                                                                                                                                                                            |

---

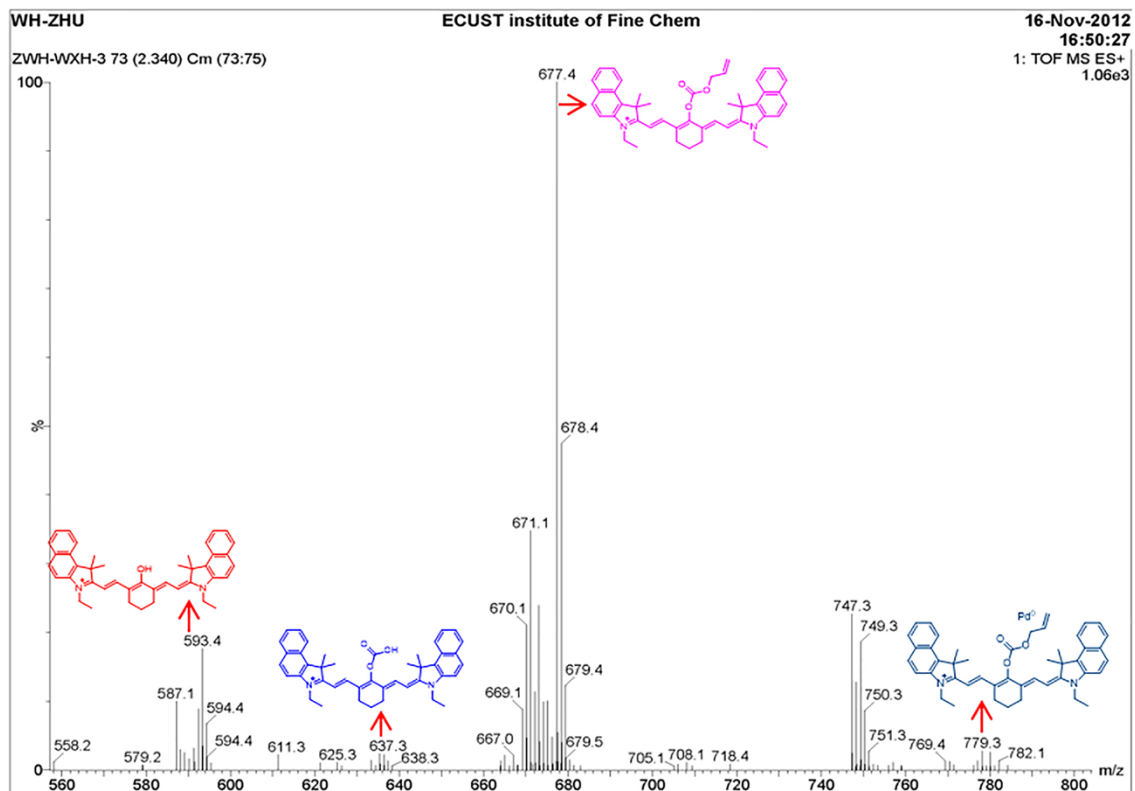

Fig. S7 Mass spectra of Cy-1 in the presence of palladium.

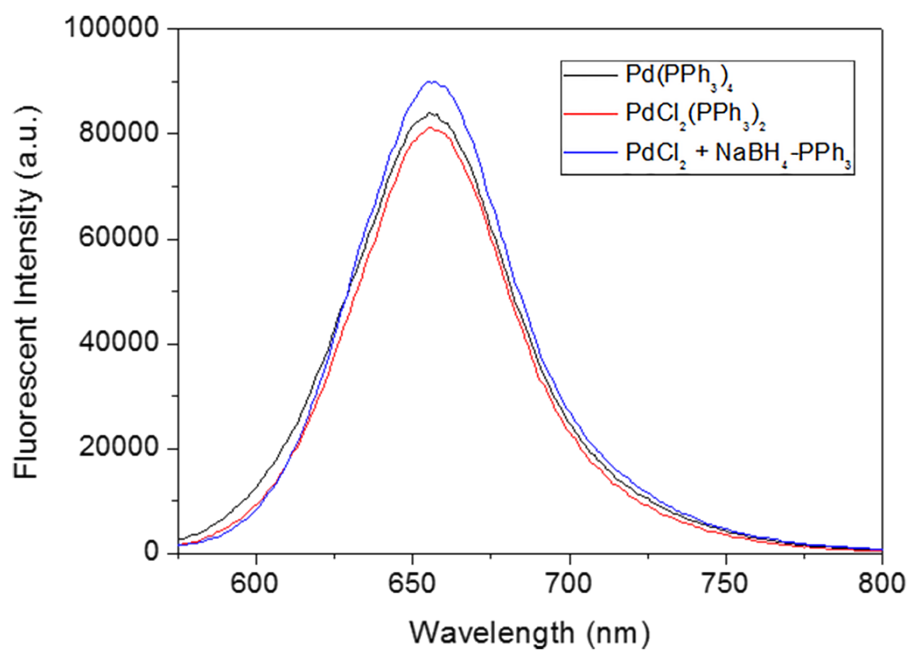

**Fig. S8** Emission spectra of **Cy-1** (10 μM) in a mixture solution of CH<sub>3</sub>CN : PBS (1 : 3, pH = 7.4, 0.01 M) with the addition different kinds of palladium species (50 μM).

PROTON CDC13 {D:\data\research\2012-11-23} nmr 22

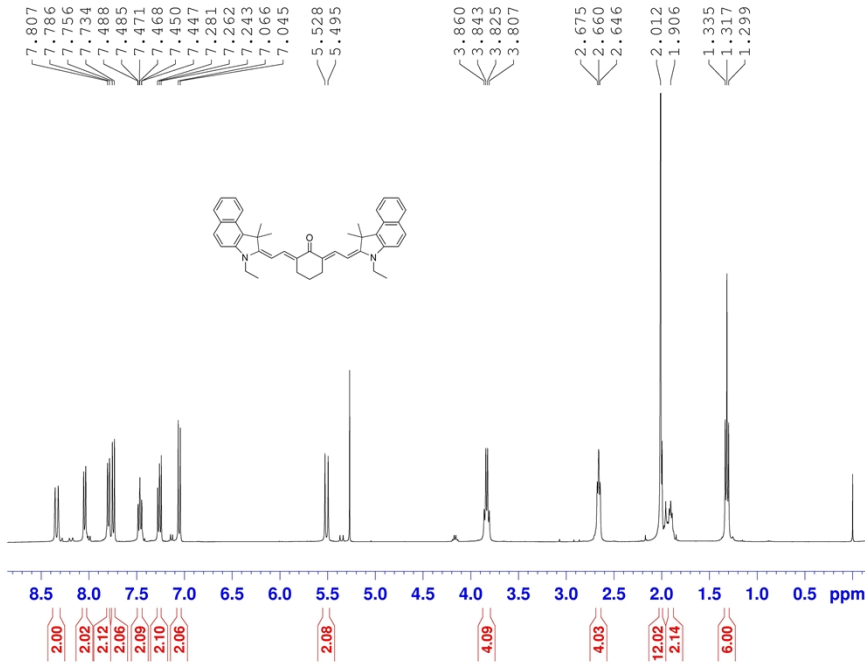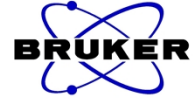

NAME yw-wxh-051  
EXPNO 10  
PROCNO 1  
Date\_ 20121124  
Time 21.13  
INSTRUM spect  
PROBHD 5 mm PABBO BB-  
PULPROG zg30  
TD 65536  
SOLVENT CDCl3  
NS 16  
DS 0  
SWH 3597.122 Hz  
FIDRES 0.054888 Hz  
AQ 9.1095543 sec  
RG 57  
DW 139.000 usec  
DE 6.50 usec  
TE 292.3 K  
D1 1.00000000 sec  
TD0 1

===== CHANNEL f1 =====  
NUC1 1H  
P1 14.75 usec  
PL1 -1.00 dB  
PL1W 13.37643433 W  
SFO1 400.1317606 MHz  
SI 32768  
SF 400.1300158 MHz  
WDW EM  
SSB 0  
LB 0.30 Hz  
GB 0  
PC 1.00

C CDC13 {D:\data\research\2012-9-21} nmr 5

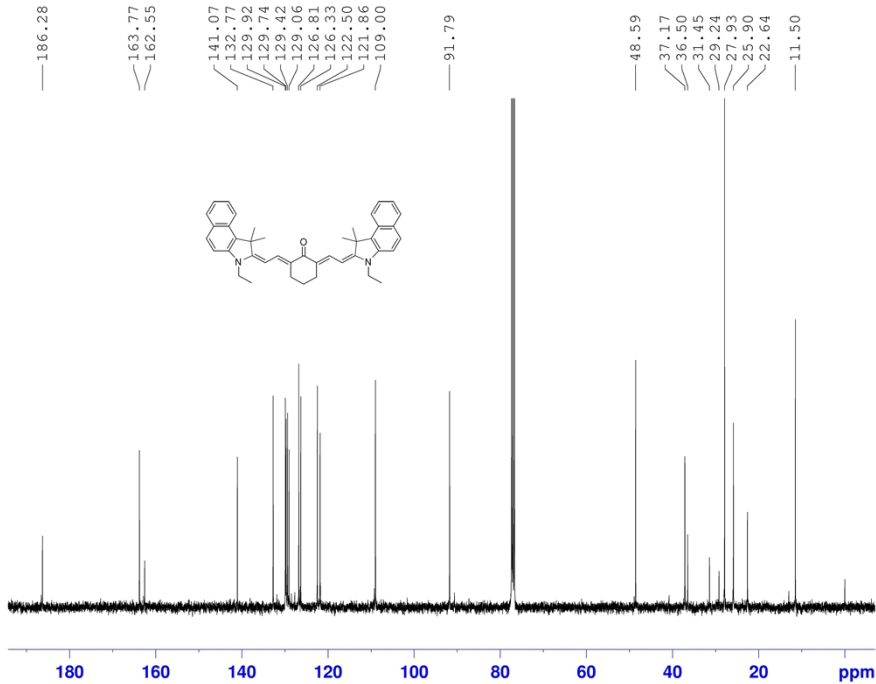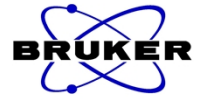

NAME yw-wxh-036  
EXPNO 10  
PROCNO 1  
Date\_ 20120922  
Time 0.52  
INSTRUM spect  
PROBHD 5 mm PABBO BB-  
PULPROG zgpg30  
TD 65536  
SOLVENT CDCl3  
NS 1000  
DS 0  
SWH 24038.461 Hz  
FIDRES 0.366798 Hz  
AQ 1.3631988 sec  
RG 203  
DW 20.800 usec  
DE 6.50 usec  
TE 294.7 K  
D1 2.00000000 sec  
D11 0.03000000 sec  
TD0 1

===== CHANNEL f1 =====  
NUC1 13C  
P1 9.85 usec  
PL1 -2.20 dB  
PL1W 60.02919006 W  
SFO1 100.6228298 MHz

===== CHANNEL f2 =====  
CPDPRG2 waltz16  
NUC2 1H  
PCPD2 90.00 usec  
PL2 -1.00 dB  
PL12 14.71 dB  
PL13 17.90 dB  
PL2W 13.37643433 W  
PL12W 0.35920334 W  
PL13W 0.17232187 W  
SFO2 400.1316005 MHz  
SI 32768  
SF 100.6127690 MHz  
WDW EM  
SSB 0  
LB 1.00 Hz  
GB 0  
PC 1.40



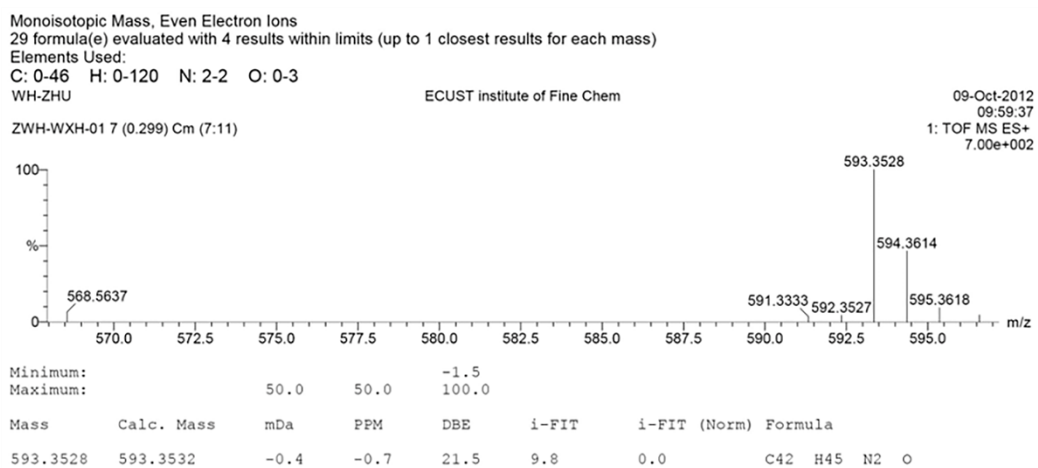

**Fig. S9**  $^1\text{H}$  and  $^{13}\text{C}$  NMR spectra and HRMS of **CyK** in the presence of palladium.



Monoisotopic Mass, Even Electron Ions  
11 formula(e) evaluated with 1 results within limits (up to 1 closest results for each mass)

Elements Used:

C: 0-46 H: 0-120 N: 2-2 O: 0-3

WH-ZHU

ECUST institute of Fine Chem

09-Oct-2012

09:54:34

1: TOF MS ES+

3.16e+003

ZWH-WXH-02 27 (0.913) Cm (25:28)

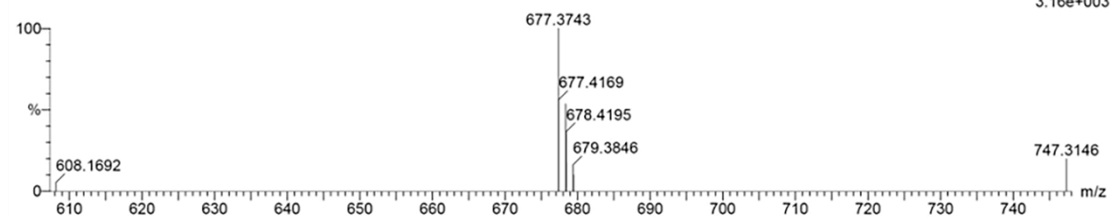

Minimum:

Maximum: 50.0 50.0 -1.5 100.0

| Mass     | Calc. Mass | mDa | PPM | DBE  | i-FIT | i-FIT (Norm) | Formula       |
|----------|------------|-----|-----|------|-------|--------------|---------------|
| 677.3743 | 677.3743   | 0.0 | 0.0 | 23.5 | 36.6  | 0.0          | C46 H49 N2 O3 |

**Fig. S10**  $^1\text{H}$  and  $^{13}\text{C}$  NMR spectra and HRMS of **Cy-1** in the presence of palladium.
